# Supplementary material for: Efficacy of Large Use of Combined Hypofractionated Radiotherapy in a Cohort of Anti-PD-1 Monotherapy-Treated Melanoma Patients
Source: MDPI journal article supplement (doi:10.3390/cancers14174069), 2022-08-23
Supplement: s1 [file s1]

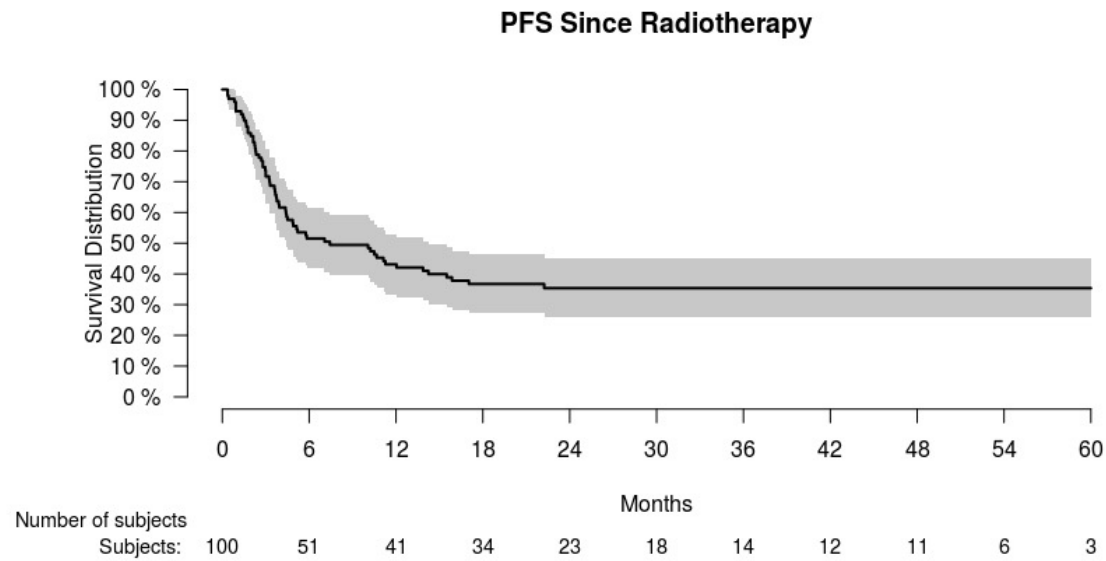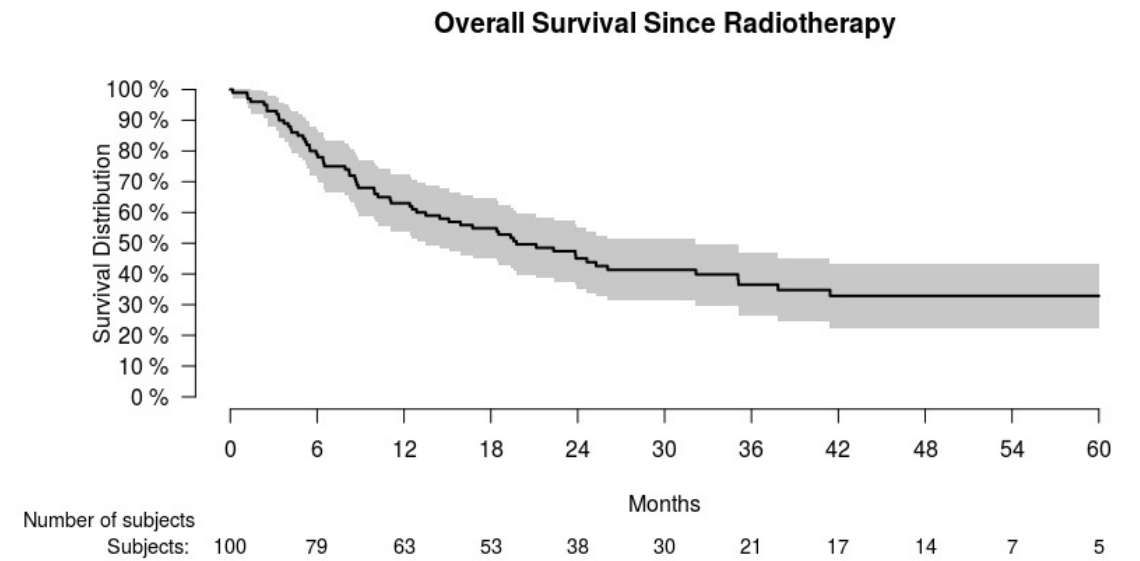

Progression free survival (PFS) and overall survival (OS) in radiated patients from day 1 of radiotherapy
